# Supplementary material for: Diagnosing Aerosol-Meteorological Interactions on Snow within the Earth System: A Proof-of-Concept Study over High Mountain Asia
Source: Copernicus journal article supplement (doi:10.5194/egusphere-2024-2298), 2024-10-14
Supplement: Supplementary file 1 [file egusphere-2024-2298-supplement.pdf]

# Supplementary Information for the article “Diagnosing Aerosol-Meteorological Interactions on Snow within the Earth System: A Proof-of-Concept Study over High Mountain Asia”

Chayan Roychoudhury<sup>1\*</sup>, Cenlin He<sup>2</sup>, Rajesh Kumar<sup>2</sup>, and Avelino F. Arellano Jr<sup>1</sup>

<sup>1</sup>Department of Hydrology and Atmospheric Sciences, University of Arizona, Tucson, AZ, USA,

<sup>2</sup>Research Applications Laboratory, NSF National Center for Atmospheric Research, Boulder, CO, USA

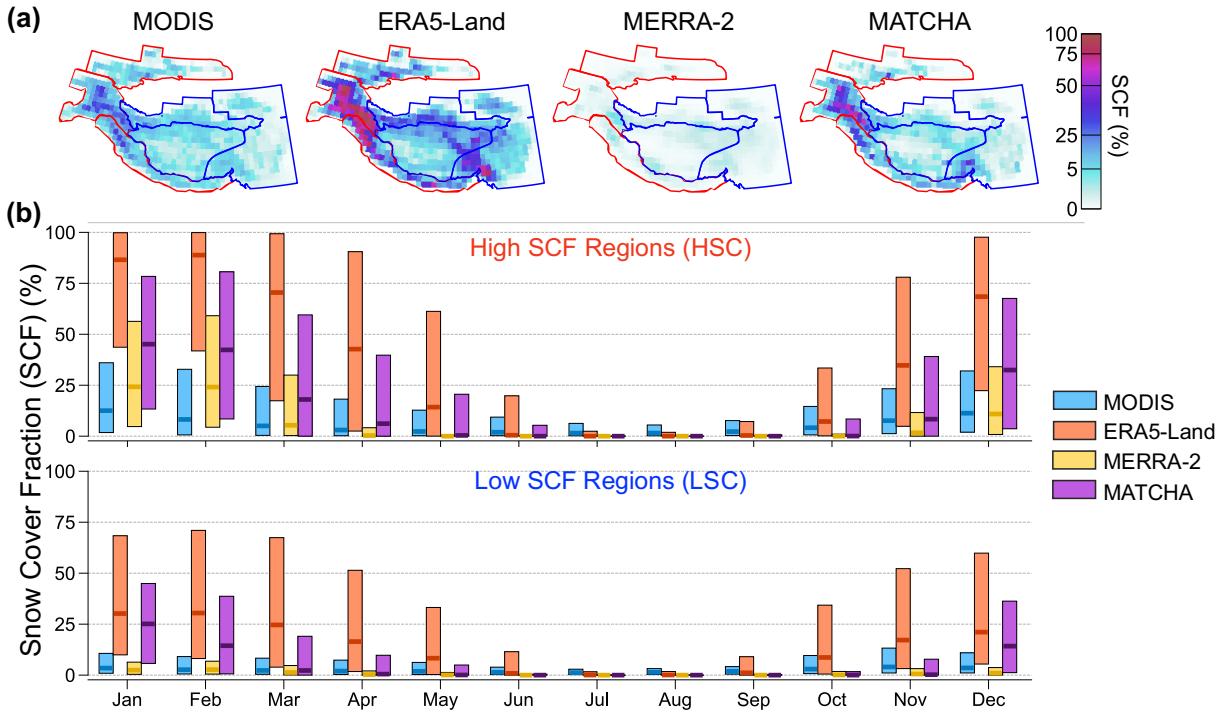

**Supplementary Figure 1. Spatio-temporal distribution of snow cover fraction over HMA.** (a) Temporal average (2003-2018) of snow cover fraction at 0.75° resolution during the late snowmelt season (May - July) with geographical outlines from RGI v6. Blue regions denote low snow cover (LSC) regions, while red regions denote high snow cover (HSC) regions. The LSC regions are composed of the following second-order regions based on the Randolph Glacier Inventory v6.0, 1) Inner Tibet, 2) S and E Tibet, 3) Hengduan Shan, 4) Qilian Shan, 5) W and E Tien Shan, 6) W and E Kun Lun. The HSC regions are composed of the following second-order regions, 1) W, C, and E Himalayas, 2) Hindu Kush, 3) Karakoram, 4) Pamir, and 5) Hissar Alay. (b) Monthly time series of snow cover fraction (SCF) across low and high snow cover regions from three reanalysis datasets and MODIS. The height of the bars represents the interquartile range (IQR) with the median.

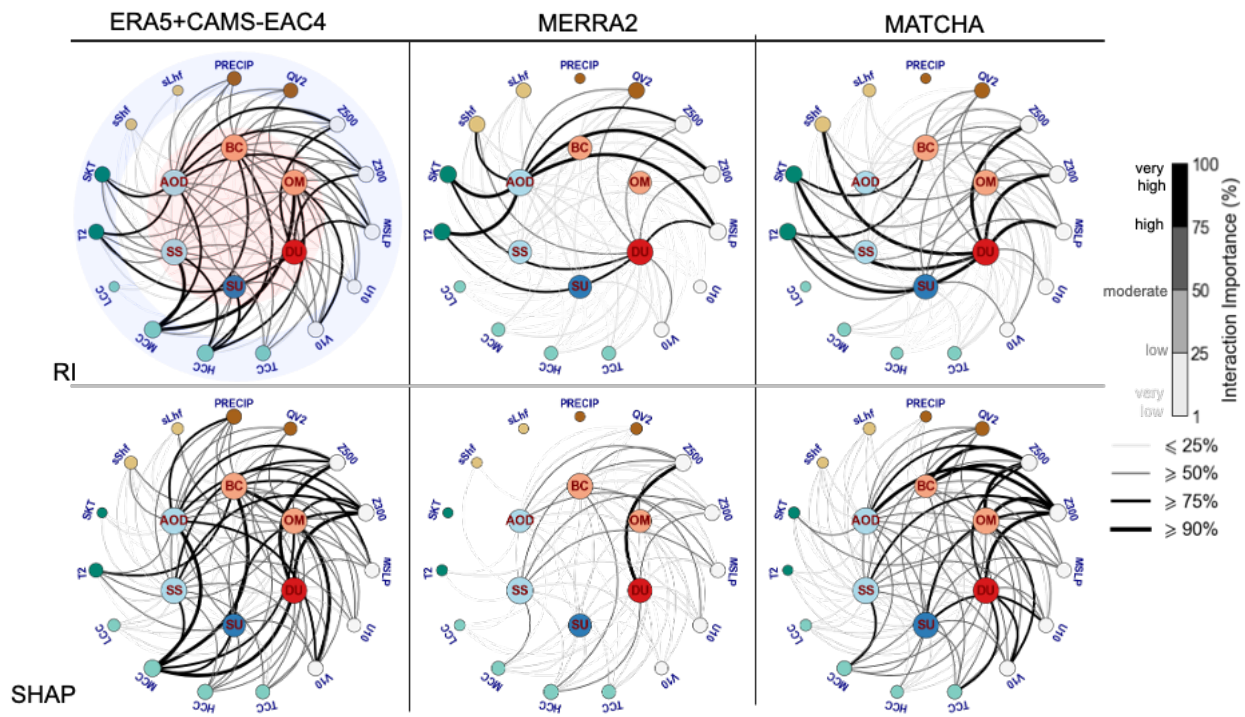

**Supplementary Figure 2. Underrepresented aerosol-meteorology interactions for all three reanalyses and each importance metric.** Network diagrams depicting the underrepresented interactions (positive difference in interaction importance from Obs-Model construct and Model-Model construct) for three reanalyses (across columns) and the importance metrics (across rows). The nodes are arranged in a concentric fashion, with the innermost nodes representing aerosol predictors (highlighted with light red shading) and the outermost nodes representing meteorology predictors (highlighted with light blue shading). The interaction importances are shown through edges connections/lines between the nodes and are weighted by colors and width denoting the strength of the importance (1 to 100%, very low-low for  $\leq 25\%$ , low-moderate for 25% to 50%, moderate-high for 50% to 75%, and high-very high for  $\geq 75\%$  shown in the color bars).

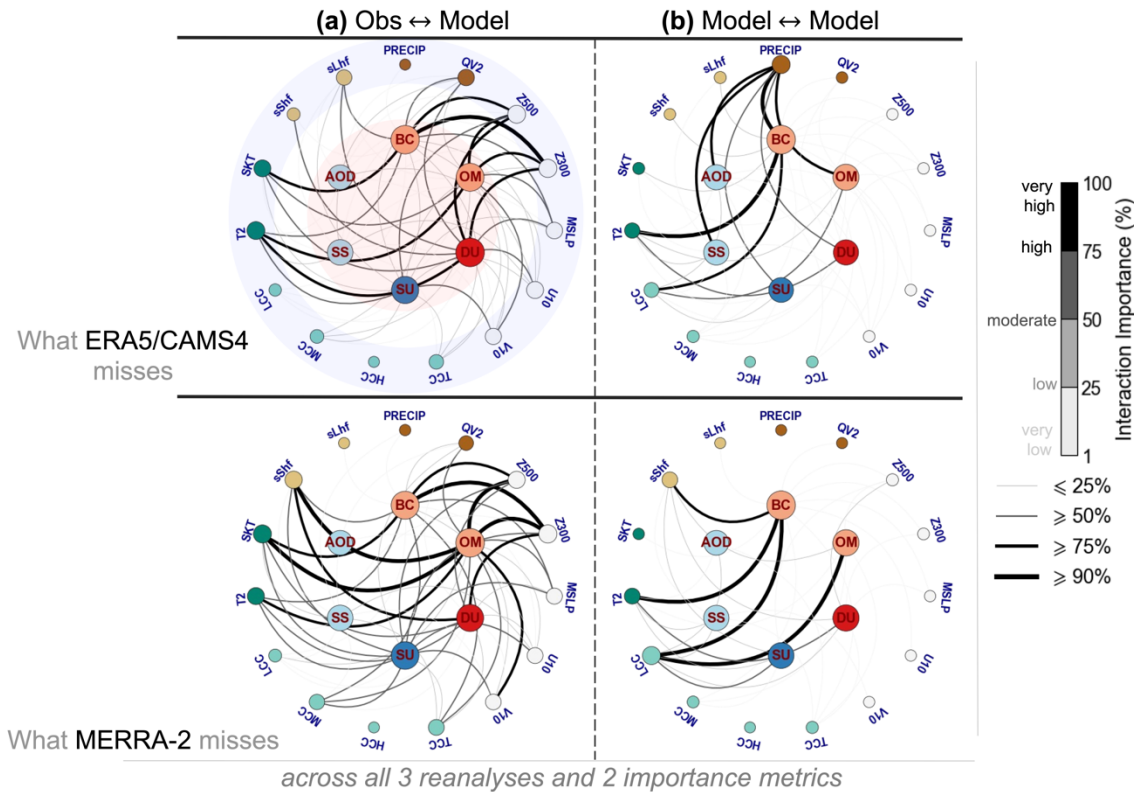

**Supplementary Figure 3. Underrepresented interactions that ERA5/CAMS4 and MERRA-2 fail to show relative to MATCHA.** Network diagrams depicting the underrepresented interactions in both reanalyses compared to MATCHA aggregated across both RI and SHAPc metrics for (a) Obs-Model and (b) Model-Model construct. The interaction importances are based on aerosol-meteorology interactions onto snow (AMI) in low snow-cover regions during the late snowmelt period (May-July). The nodes are arranged in a concentric fashion, with the innermost nodes representing aerosol predictors (highlighted with light red shading) and the outermost nodes representing meteorology predictors (highlighted with light blue shading). The interaction importances is shown through edges connections/lines between the nodes and are weighted by colors and width denoting the strength of the importance (1 to 100%, very low-low for  $\leq 25\%$ , low-moderate for 25% to 50%, moderate-high for 50% to 75%, and high-very high for  $\geq 75\%$  shown in the color bars).

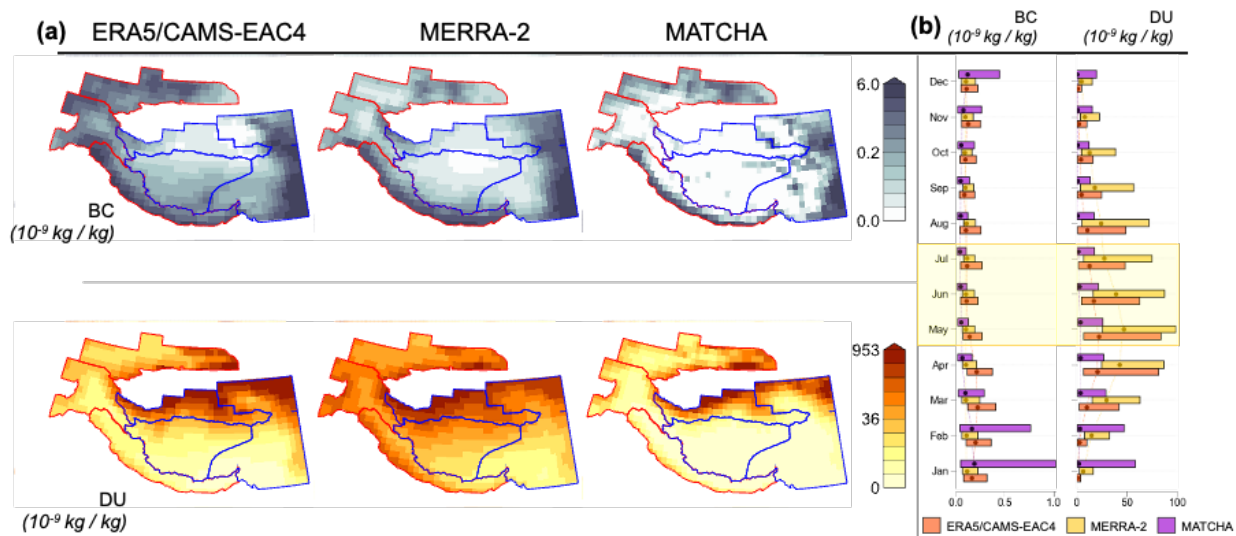

**Supplementary Figure 4.** Spatio-temporal distribution of surface black carbon (BC) and dust mixing ratios (DU) over HMA. (a) Temporal average (2003-2018) of BC and DU at a horizontal resolution of  $0.75^\circ$  used in our methodology across three reanalysis datasets during the late snowmelt season (May - July). Blue regions denote low snow cover (LSC) regions, while red regions denote high snow cover (HSC) regions. (b) Monthly time series of BC and DU across LSC regions for the three reanalysis datasets. The width of the bars represents the interquartile range (IQR) with the median denoted by dark circles.

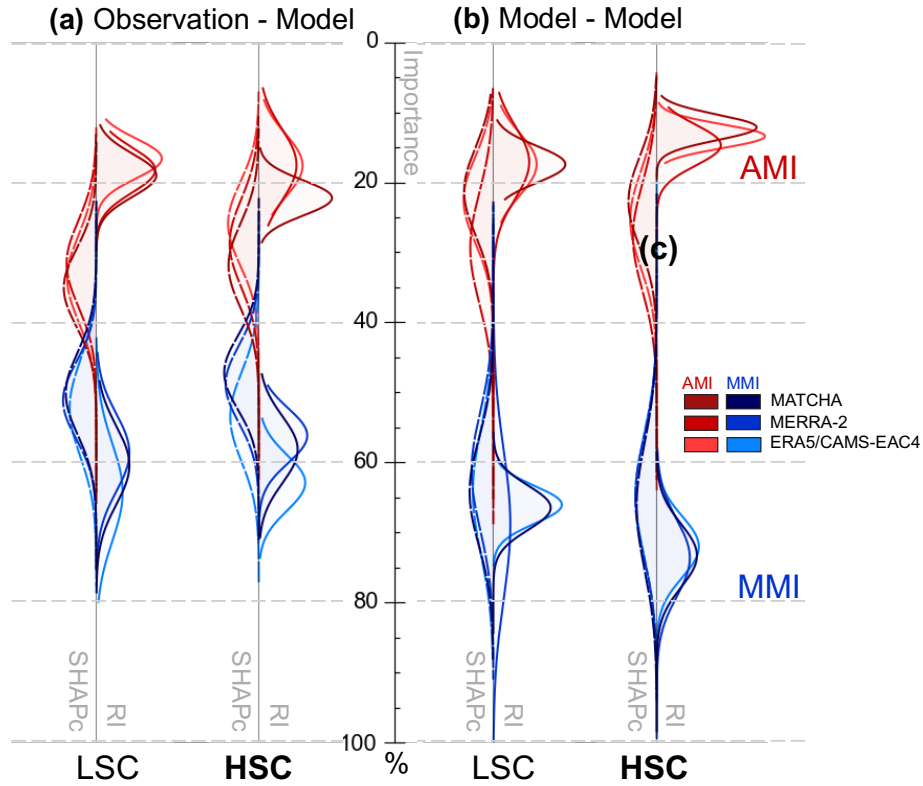

**Supplementary Figure 5. Importance of aerosol-meteorology interactions on snow in low and high snow-covered regions.** Distributions of importance metrics, relative importance (RI, solid), and Shapely contribution (SHAPc,dashed) for aerosol-meteorology (AMI) and meteorology-meteorology (MMI) interactions on snow shown for the Obs-Model (a) and Model-Model (c) construct across three reanalyses (ERA5/CAMS-EAC4, MERRA-2 and MATCHA).

**Supplementary Table 1.** Overview of reanalysis and observation datasets used.

|                                 | <b>ERA5/CAMS-EAC4</b>                                       | <b>MERRA-2</b>                      | <b>MATCHA</b>                        |
|---------------------------------|-------------------------------------------------------------|-------------------------------------|--------------------------------------|
| <b>Spatial Resolution</b>       | 0.1° (ERA5-Land)<br>0.25° (ERA5)<br>0.75° (CAMS-EAC4)       | 0.5° by 0.625°                      | 12 km                                |
| <b>Temporal Resolution</b>      | hourly                                                      | hourly                              | hourly to 3-hourly                   |
| <b>Atmospheric Model</b>        | IFS Cy41r2                                                  | GEOS 5.12.4                         | WRF v3.9.1                           |
| <b>Land Model</b>               | HTESSEL <sup>1</sup>                                        | Catchment LSM <sup>2</sup>          | CLM v4.5 – SNICAR <sup>3</sup>       |
| <b>Snow Model</b>               | 1 Layer                                                     | 3 Layer                             | 5 Layers                             |
| <b>Aerosol Model</b>            | CAMS-IFS <sup>4</sup>                                       | GOCART <sup>5</sup>                 | MOSAIC <sup>6</sup>                  |
| <b>Coupling Schemes</b>         | None till date <sup>a</sup>                                 | Aerosol-Radiation <sup>b</sup>      | Aerosol-Radiation-Snow <sup>c</sup>  |
| <b>Assimilated Observations</b> |                                                             |                                     |                                      |
| Snow                            | in-situ (not for >1500 m elevation locations)<br>IMS (4 km) |                                     |                                      |
| AOD                             | AATSR (Envisat)<br>MODIS Terra/Aqua                         | MISR<br>AERONET<br>MODIS Terra/Aqua | MODIS Terra/Aqua                     |
| CO                              | MOPITT CO (Total Column)                                    |                                     | MOPITT CO (Profile and Total Column) |

<sup>a</sup>Aerosol reanalysis from CAMS is not coupled to ERA5 meteorology which instead uses a monthly climatology for aerosols. Recent developments suggest a step towards incorporating aerosol coupling in the ECMWF IFS model <sup>7</sup>.

<sup>b</sup>Aerosol reanalysis is radiatively coupled into the GEOS-5 model.

<sup>c</sup>Aerosol products are radiatively coupled with meteorology in WRF, while CLM-SNICAR couples aerosol deposition to snow properties.

**Supplementary Table 2.** Overview of the variables used in our study.

| <b>Reanalysis</b> |                               |                                        |                              |                      |                  |
|-------------------|-------------------------------|----------------------------------------|------------------------------|----------------------|------------------|
| <b>Predictors</b> | <b>Group</b>                  | <b>Variable Name<br/>(with units)</b>  | <b>ERA5/ERA5-<br/>L/CAMS</b> | <b>MERRA2</b>        | <b>MATCHA</b>    |
|                   | Carbonaceous                  | BC mixing ratio at the surface (kg/kg) | aermr09<br>aermr10           | BCPHOLIC<br>BCPHOBIC | BC_SFC_TOT       |
|                   | Carbonaceous                  | OM mixing ratio at the surface (kg/kg) | aermr07<br>aermr08           | OCPHILIC<br>OCPHOBIC | OC_SFC_TOT       |
|                   | Dust                          | DU mixing ratio at the surface (kg/kg) | aermr0(4-6)                  | DU00(1-5)            | DUST_SFC_TOT     |
|                   | Sulphate                      | SU mixing ratio at the surface (kg/kg) | aermr11                      | SO4                  | SO4_SFC_TOT      |
|                   | Others                        | SS mixing ratio at the surface (kg/kg) | aermr0(1-3)                  | SS00(1-5)            | NA_SFC_TOT       |
|                   | Others                        | Aerosol optical depth at 550nm*        | taod550                      | TOTEXTTAU            | AOD_550          |
|                   | Moisture                      | Daily Accumulated Precipitation (mm)   | tp (ERA5-Land)               | PRECTOTLAND          | RAINNC<br>RAINNC |
|                   | Moisture                      | Specific Humidity (kg/kg)              | d2m <sup>a</sup>             | QV2M                 | Q2               |
|                   | Circulation                   | Geopotential Height at 500 hPa (m)     | z                            | H                    | PHP              |
|                   | Circulation                   | Geopotential Height at 300 hPa (m)     | z                            | H                    | PHP              |
|                   | Circulation                   | Mean Sea Level Pressure (Pa)           | msl                          | SLP                  | P<br>PB          |
|                   | Circulation                   | Zonal Wind at 10 m (m/s)               | u10                          | U10M                 | U10              |
|                   | Circulation                   | Meridional Wind at 10 m (m/s)          | v10                          | V10M                 | V10              |
|                   | Cloud Cover (CC) <sup>b</sup> | Total CC                               | tcc                          | CLDTOT               | CFRACT           |

|                  |                                                |           |        |        |
|------------------|------------------------------------------------|-----------|--------|--------|
| Cloud Cover (CC) | High CC <sup>c</sup>                           | hcc       | CLDHGH | CFRACT |
| Cloud Cover (CC) | Medium CC <sup>d</sup>                         | mcc       | CLDMID | CFRACT |
| Cloud Cover (CC) | Low CC <sup>e</sup>                            | lcc       | CLDLOW | CFRACT |
| Temperature      | Temperature at 2 m (K)                         | t2m       | T2M    | T2     |
| Temperature      | Skin Temperature (K)                           | skt       | TS     | TSK    |
| Radiation        | Surface Sensible Heat Flux (W/m <sup>2</sup> ) | sshf      | SHLAND | HFX    |
| Radiation        | Surface Latent Heat Flux (W/m <sup>2</sup> )   | slhf      | LHLAND | LH     |
| Elevation        | Elevation (m)                                  | GMTED2010 |        |        |

---

|               |                         |                |       |          |
|---------------|-------------------------|----------------|-------|----------|
| <b>Target</b> | Snow Cover Fraction (%) | sc (ERA5-Land) | FRSNO | SNOWFRAC |
|---------------|-------------------------|----------------|-------|----------|

---

|                     |                                      |                 |
|---------------------|--------------------------------------|-----------------|
| <b>Observations</b> | Snow Cover Fraction (%)              | MOD10C1         |
|                     |                                      | MYD10C1         |
|                     | Land Surface Temperature (K)         | MOD11C1         |
|                     |                                      | MYD11C1         |
|                     | AOD at 550 nm*                       | MCD19A2         |
|                     | Daily Accumulated Precipitation (mm) | IMERG Final Run |

<sup>a</sup>Dewpoint at 2m from ERA5 converted to specific humidity following Bolton <sup>8</sup>.

<sup>b</sup>All cloud cover variables are in fraction (0-1).

<sup>c</sup>High cloud cover defined for model pressure levels < 0.4-0.45  $P_s$  hPa across all three reanalyses where  $P_s$  is the surface pressure in hPa.

<sup>d</sup>Medium cloud cover defined with (0.4-0.8)  $P_s$  hPa for ERA5 and MATCHA, while 400-700 hPa based on MERRA-2's model terrain following coordinate.

<sup>e</sup>Low cloud cover defined within (1 - 0.8)  $P_s$  hPa for ERA5 and MATCHA while 1000-700 hPa based on MERRA-2's model terrain following coordinate.

\*Aerosol optical depth at 550 nm is unitless.



## Supplementary References

1. Dutra, E. *et al.* An Improved Snow Scheme for the ECMWF Land Surface Model: Description and Offline Validation. *Journal of Hydrometeorology* **11**, 899–916 (2010).
2. Koster, R. D., Suarez, M. J., Ducharne, A., Stieglitz, M. & Kumar, P. A catchment-based approach to modeling land surface processes in a general circulation model: 1. Model structure. *Journal of Geophysical Research: Atmospheres* **105**, 24809–24822 (2000).
3. Flanner, M. G., Zender, C. S., Randerson, J. T. & Rasch, P. J. Present-day climate forcing and response from black carbon in snow. *Journal of Geophysical Research: Atmospheres* **112**, (2007).
4. Morcrette, J.-J. *et al.* Aerosol analysis and forecast in the European Centre for Medium-Range Weather Forecasts Integrated Forecast System: Forward modeling. *Journal of Geophysical Research: Atmospheres* **114**, (2009).
5. Chin, M. *et al.* Tropospheric Aerosol Optical Thickness from the GOCART Model and Comparisons with Satellite and Sun Photometer Measurements. *Journal of the Atmospheric Sciences* **59**, 461–483 (2002).
6. Zaveri, R. A., Easter, R. C., Fast, J. D. & Peters, L. K. Model for Simulating Aerosol Interactions and Chemistry (MOSAIC). *Journal of Geophysical Research: Atmospheres* **113**, (2008).
7. Benedetti, A. & Vitart, F. Can the Direct Effect of Aerosols Improve Subseasonal Predictability? *Monthly Weather Review* **146**, 3481–3498 (2018).
8. Bolton, D. The Computation of Equivalent Potential Temperature. *Monthly Weather Review* **108**, 1046–1053 (1980).
